# Supplementary material
Source: publisher figshare collection journal article supplement (https://acs.figshare.com/ndownloader/files/4663591)
Supplement: Supplementary file 1 [file 4663591]

 
data_pg066
 
_audit_creation_method            SHELXL-97
_chemical_name_systematic
;
 ?
;
_chemical_name_common             ?
_chemical_melting_point           ?
_chemical_formula_moiety          ?
_chemical_formula_sum
 'C16 H21 Ag Cl N3 O'
_chemical_formula_weight          414.68
 
loop_
 _atom_type_symbol
 _atom_type_description
 _atom_type_scat_dispersion_real
 _atom_type_scat_dispersion_imag
 _atom_type_scat_source
 'C'  'C'   0.0033   0.0016
 'International Tables Vol C Tables 4.2.6.8 and 6.1.1.4'
 'H'  'H'   0.0000   0.0000
 'International Tables Vol C Tables 4.2.6.8 and 6.1.1.4'
 'N'  'N'   0.0061   0.0033
 'International Tables Vol C Tables 4.2.6.8 and 6.1.1.4'
 'O'  'O'   0.0106   0.0060
 'International Tables Vol C Tables 4.2.6.8 and 6.1.1.4'
 'Cl'  'Cl'   0.1484   0.1585
 'International Tables Vol C Tables 4.2.6.8 and 6.1.1.4'
 'Ag'  'Ag'  -0.8971   1.1015
 'International Tables Vol C Tables 4.2.6.8 and 6.1.1.4'
 
_symmetry_cell_setting           'Monoclinic'
_symmetry_space_group_name_H-M   'P 21/c'
 
loop_
 _symmetry_equiv_pos_as_xyz
 'x, y, z'
 '-x, y+1/2, -z+1/2'
 '-x, -y, -z'
 'x, -y-1/2, z-1/2'
 
_cell_length_a                    14.3695(10)
_cell_length_b                    6.0275(3)
_cell_length_c                    20.8243(13)
_cell_angle_alpha                 90.00
_cell_angle_beta                  103.407(7)
_cell_angle_gamma                 90.00
_cell_volume                      1754.48(19)
_cell_formula_units_Z             4
_cell_measurement_temperature     150(2)
_cell_measurement_reflns_used   5624
_cell_measurement_theta_min     3.2999
_cell_measurement_theta_max     32.3681
 
_exptl_crystal_description        block
_exptl_crystal_colour             colourless
_exptl_crystal_size_max           0.36
_exptl_crystal_size_mid           0.28
_exptl_crystal_size_min           0.22
_exptl_crystal_density_meas       ?
_exptl_crystal_density_diffrn     1.570
_exptl_crystal_density_method     'not measured'
_exptl_crystal_F_000              840
_exptl_absorpt_coefficient_mu     1.306
_exptl_absorpt_correction_T_min   0.6508
_exptl_absorpt_correction_T_max   0.7621
_exptl_absorpt_correction_type            'multi-scan'
_exptl_absorpt_process_details
;
CrysAlis RED, Oxford Diffraction Ltd.,
Version 1.171.31.5 (release 28-08-2006 CrysAlis171 .NET)
(compiled Aug 28 2006,13:05:05)
Empirical absorption correction using spherical harmonics,
 implemented in SCALE3 ABSPACK scaling algorithm.
;
 
_diffrn_ambient_temperature       150(2)
_diffrn_radiation_wavelength      0.71073
_diffrn_radiation_type            MoK\a
_diffrn_radiation_source          'Enhance (Mo) X-ray Source'
_diffrn_radiation_monochromator   graphite
_diffrn_measurement_device_type   ?
_diffrn_measurement_method        ?
_diffrn_detector_area_resol_mean  15.9948
_diffrn_standards_number          ?
_diffrn_standards_interval_count  ?
_diffrn_standards_interval_time   ?
_diffrn_standards_decay_%         ?
_diffrn_reflns_number             9847
_diffrn_reflns_av_R_equivalents   0.0354
_diffrn_reflns_av_sigmaI/netI     0.0318
_diffrn_reflns_limit_h_min        -16
_diffrn_reflns_limit_h_max        17
_diffrn_reflns_limit_k_min        -7
_diffrn_reflns_limit_k_max        7
_diffrn_reflns_limit_l_min        -24
_diffrn_reflns_limit_l_max        24
_diffrn_reflns_theta_min          3.53
_diffrn_reflns_theta_max          25.00
_reflns_number_total              2939
_reflns_number_gt                 2077
_reflns_threshold_expression      >2sigma(I)
 
_computing_data_collection        'CrysAlis CCD, Oxford Diffraction Ltd.,'
_computing_cell_refinement        'CrysAlis RED, Oxford Diffraction Ltd.,'
_computing_data_reduction         'CrysAlis RED, Oxford Diffraction Ltd.,'
_computing_structure_solution     'SHELXS-97 (Sheldrick, 1997)'
_computing_structure_refinement   'SHELXL-97 (Sheldrick, 1997)'
_computing_molecular_graphics     'Ortep3'
_computing_publication_material   'Shelx97'
 
_refine_special_details
;
 Refinement of F^2^ against ALL reflections.  The weighted R-factor wR and
 goodness of fit S are based on F^2^, conventional R-factors R are based
 on F, with F set to zero for negative F^2^. The threshold expression of
 F^2^ > 2sigma(F^2^) is used only for calculating R-factors(gt) etc. and is
 not relevant to the choice of reflections for refinement.  R-factors based
 on F^2^ are statistically about twice as large as those based on F, and R-
 factors based on ALL data will be even larger.
;
 
_refine_ls_structure_factor_coef  Fsqd
_refine_ls_matrix_type            full
_refine_ls_weighting_scheme       calc
_refine_ls_weighting_details
 'calc w=1/[\s^2^(Fo^2^)+(0.1960P)^2^+4.5259P] where P=(Fo^2^+2Fc^2^)/3'
_atom_sites_solution_primary      direct
_atom_sites_solution_secondary    difmap
_atom_sites_solution_hydrogens    geom
_refine_ls_hydrogen_treatment     mixed
_refine_ls_extinction_method      none
_refine_ls_extinction_coef        ?
_refine_ls_number_reflns          2939
_refine_ls_number_parameters      202
_refine_ls_number_restraints      0
_refine_ls_R_factor_all           0.0972
_refine_ls_R_factor_gt            0.0785
_refine_ls_wR_factor_ref          0.2606
_refine_ls_wR_factor_gt           0.2210
_refine_ls_goodness_of_fit_ref    1.055
_refine_ls_restrained_S_all       1.055
_refine_ls_shift/su_max           0.000
_refine_ls_shift/su_mean          0.000
 
loop_
 _atom_site_label
 _atom_site_type_symbol
 _atom_site_fract_x
 _atom_site_fract_y
 _atom_site_fract_z
 _atom_site_U_iso_or_equiv
 _atom_site_adp_type
 _atom_site_occupancy
 _atom_site_symmetry_multiplicity
 _atom_site_calc_flag
 _atom_site_refinement_flags
 _atom_site_disorder_assembly
 _atom_site_disorder_group
Ag1 Ag 0.47888(5) 0.17429(10) 0.05271(3) 0.0372(4) Uani 1 1 d . . .
Cl1 Cl 0.37128(16) 0.3710(4) -0.03092(9) 0.0387(6) Uani 1 1 d . . .
O1 O 0.3329(4) -0.0930(10) 0.1669(3) 0.0383(13) Uani 1 1 d . . .
N1 N 0.5254(5) -0.1741(9) 0.1646(3) 0.0305(15) Uani 1 1 d . . .
N2 N 0.6282(5) 0.0869(11) 0.1870(3) 0.0315(14) Uani 1 1 d . . .
N3 N 0.2843(6) -0.3150(10) 0.0742(3) 0.0360(18) Uani 1 1 d . . .
H3 H 0.3041 -0.4087 0.0492 0.043 Uiso 1 1 calc R . .
C1 C 0.5521(6) 0.0111(13) 0.1398(4) 0.0360(18) Uani 1 1 d . . .
C2 C 0.5830(6) -0.2192(15) 0.2259(4) 0.0366(19) Uani 1 1 d . . .
H2 H 0.5773 -0.3397 0.2526 0.044 Uiso 1 1 calc R . .
C3 C 0.6490(6) -0.0579(13) 0.2402(4) 0.0344(18) Uani 1 1 d . . .
H3 H 0.6982 -0.0457 0.2779 0.041 Uiso 1 1 calc R . .
C4 C 0.4499(6) -0.3204(10) 0.1276(4) 0.0298(18) Uani 1 1 d . . .
H4A H 0.4554 -0.4651 0.1485 0.036 Uiso 1 1 calc R . .
H4B H 0.4585 -0.3392 0.0830 0.036 Uiso 1 1 calc R . .
C5 C 0.3486(6) -0.2240(14) 0.1247(4) 0.0356(19) Uani 1 1 d . . .
C6 C 0.1790(6) -0.2602(15) 0.0594(4) 0.0361(18) Uani 1 1 d . . .
C7 C 0.1355(7) -0.3406(14) 0.1146(5) 0.042(2) Uani 1 1 d . . .
H7A H 0.1470 -0.4968 0.1211 0.062 Uiso 1 1 calc R . .
H7B H 0.0678 -0.3133 0.1034 0.062 Uiso 1 1 calc R . .
H7C H 0.1641 -0.2627 0.1545 0.062 Uiso 1 1 calc R . .
C8 C 0.1334(7) -0.3878(17) -0.0037(4) 0.048(2) Uani 1 1 d . . .
H8A H 0.1401 -0.5443 0.0046 0.071 Uiso 1 1 calc R . .
H8B H 0.1649 -0.3483 -0.0380 0.071 Uiso 1 1 calc R . .
H8C H 0.0668 -0.3506 -0.0172 0.071 Uiso 1 1 calc R . .
C9 C 0.1631(7) -0.0131(14) 0.0481(4) 0.045(2) Uani 1 1 d . . .
H9A H 0.0978 0.0132 0.0255 0.067 Uiso 1 1 calc R . .
H9B H 0.2050 0.0414 0.0219 0.067 Uiso 1 1 calc R . .
H9C H 0.1764 0.0624 0.0898 0.067 Uiso 1 1 calc R . .
C10 C 0.6880(7) 0.2825(14) 0.1800(4) 0.0385(19) Uani 1 1 d . . .
H10A H 0.6926 0.3791 0.2178 0.046 Uiso 1 1 calc R . .
H10B H 0.6572 0.3650 0.1408 0.046 Uiso 1 1 calc R . .
C11 C 0.7884(6) 0.2167(13) 0.1747(4) 0.0341(18) Uani 1 1 d . . .
C12 C 0.8061(7) 0.0171(14) 0.1457(4) 0.0369(19) Uani 1 1 d . . .
H12 H 0.7566 -0.0828 0.1304 0.044 Uiso 1 1 calc R . .
C13 C 0.8987(7) -0.0312(14) 0.1397(4) 0.040(2) Uani 1 1 d . . .
H13 H 0.9106 -0.1652 0.1210 0.048 Uiso 1 1 calc R . .
C14 C 0.9736(8) 0.1175(17) 0.1613(5) 0.051(2) Uani 1 1 d . . .
H14 H 1.0353 0.0841 0.1574 0.061 Uiso 1 1 calc R . .
C15 C 0.9540(7) 0.3161(14) 0.1887(5) 0.044(2) Uani 1 1 d . . .
H15 H 1.0030 0.4182 0.2027 0.053 Uiso 1 1 calc R . .
C16 C 0.8639(7) 0.3655(15) 0.1957(4) 0.038(2) Uani 1 1 d . . .
H16 H 0.8528 0.4997 0.2147 0.046 Uiso 1 1 calc R . .
 
loop_
 _atom_site_aniso_label
 _atom_site_aniso_U_11
 _atom_site_aniso_U_22
 _atom_site_aniso_U_33
 _atom_site_aniso_U_23
 _atom_site_aniso_U_13
 _atom_site_aniso_U_12
Ag1 0.0462(6) 0.0364(5) 0.0275(5) 0.0003(2) 0.0054(3) 0.0064(2)
Cl1 0.0411(13) 0.0482(11) 0.0250(10) -0.0010(8) 0.0042(9) 0.0064(9)
O1 0.041(3) 0.045(3) 0.031(3) -0.007(2) 0.014(3) 0.002(3)
N1 0.034(4) 0.028(3) 0.032(4) 0.002(2) 0.013(3) 0.003(2)
N2 0.031(4) 0.032(3) 0.032(3) 0.004(3) 0.010(3) 0.001(3)
N3 0.055(5) 0.032(4) 0.020(3) -0.003(2) 0.006(3) -0.007(3)
C1 0.038(5) 0.039(4) 0.034(4) 0.001(3) 0.014(4) -0.002(4)
C2 0.037(5) 0.039(4) 0.035(4) 0.013(3) 0.011(4) 0.003(4)
C3 0.037(5) 0.034(4) 0.032(4) -0.001(3) 0.007(3) 0.005(3)
C4 0.040(5) 0.014(3) 0.037(4) -0.014(3) 0.013(4) 0.000(3)
C5 0.040(5) 0.038(4) 0.030(4) -0.001(3) 0.009(4) 0.000(4)
C6 0.033(5) 0.040(4) 0.036(4) -0.002(4) 0.011(4) 0.000(4)
C7 0.039(5) 0.044(5) 0.040(5) -0.008(3) 0.008(4) 0.002(4)
C8 0.051(6) 0.054(5) 0.038(5) -0.002(4) 0.010(4) -0.003(5)
C9 0.046(5) 0.043(5) 0.046(5) -0.005(4) 0.011(4) 0.004(4)
C10 0.044(5) 0.037(4) 0.037(5) 0.002(3) 0.015(4) 0.003(4)
C11 0.038(5) 0.036(4) 0.030(4) 0.005(3) 0.009(4) 0.004(3)
C12 0.046(5) 0.039(4) 0.029(4) 0.002(3) 0.016(4) -0.004(4)
C13 0.047(5) 0.042(5) 0.034(4) 0.001(3) 0.015(4) 0.007(4)
C14 0.046(6) 0.064(6) 0.044(5) 0.001(5) 0.014(4) 0.000(5)
C15 0.045(6) 0.047(5) 0.037(5) 0.004(3) 0.002(4) -0.007(4)
C16 0.042(5) 0.047(5) 0.028(4) 0.000(3) 0.010(4) -0.006(4)
 
_geom_special_details
;
 All esds (except the esd in the dihedral angle between two l.s. planes)
 are estimated using the full covariance matrix.  The cell esds are taken
 into account individually in the estimation of esds in distances, angles
 and torsion angles; correlations between esds in cell parameters are only
 used when they are defined by crystal symmetry.  An approximate (isotropic)
 treatment of cell esds is used for estimating esds involving l.s. planes.
;
 
loop_
 _geom_bond_atom_site_label_1
 _geom_bond_atom_site_label_2
 _geom_bond_distance
 _geom_bond_site_symmetry_2
 _geom_bond_publ_flag
Ag1 C1 2.116(8) . ?
Ag1 Cl1 2.362(2) . ?
Ag1 Ag1 3.1970(12) 3_655 ?
O1 C5 1.242(10) . ?
N1 C1 1.324(10) . ?
N1 C2 1.378(11) . ?
N1 C4 1.470(10) . ?
N2 C1 1.368(10) . ?
N2 C3 1.388(10) . ?
N2 C10 1.486(11) . ?
N3 C5 1.345(11) . ?
N3 C6 1.510(12) . ?
N3 H3 0.8600 . ?
C2 C3 1.342(12) . ?
C2 H2 0.9300 . ?
C3 H3 0.9300 . ?
C4 C5 1.555(12) . ?
C4 H4A 0.9700 . ?
C4 H4B 0.9700 . ?
C6 C7 1.509(13) . ?
C6 C9 1.517(12) . ?
C6 C8 1.532(12) . ?
C7 H7A 0.9600 . ?
C7 H7B 0.9600 . ?
C7 H7C 0.9600 . ?
C8 H8A 0.9600 . ?
C8 H8B 0.9600 . ?
C8 H8C 0.9600 . ?
C9 H9A 0.9600 . ?
C9 H9B 0.9600 . ?
C9 H9C 0.9600 . ?
C10 C11 1.524(13) . ?
C10 H10A 0.9700 . ?
C10 H10B 0.9700 . ?
C11 C12 1.396(12) . ?
C11 C16 1.398(12) . ?
C12 C13 1.395(13) . ?
C12 H12 0.9300 . ?
C13 C14 1.393(14) . ?
C13 H13 0.9300 . ?
C14 C15 1.383(14) . ?
C14 H14 0.9300 . ?
C15 C16 1.368(15) . ?
C15 H15 0.9300 . ?
C16 H16 0.9300 . ?
 
loop_
 _geom_angle_atom_site_label_1
 _geom_angle_atom_site_label_2
 _geom_angle_atom_site_label_3
 _geom_angle
 _geom_angle_site_symmetry_1
 _geom_angle_site_symmetry_3
 _geom_angle_publ_flag
C1 Ag1 Cl1 167.3(2) . . ?
C1 Ag1 Ag1 98.5(2) . 3_655 ?
Cl1 Ag1 Ag1 91.12(5) . 3_655 ?
C1 N1 C2 111.2(7) . . ?
C1 N1 C4 123.1(7) . . ?
C2 N1 C4 125.4(6) . . ?
C1 N2 C3 110.6(7) . . ?
C1 N2 C10 125.4(6) . . ?
C3 N2 C10 123.7(7) . . ?
C5 N3 C6 123.0(7) . . ?
C5 N3 H3 118.5 . . ?
C6 N3 H3 118.5 . . ?
N1 C1 N2 104.9(7) . . ?
N1 C1 Ag1 126.5(6) . . ?
N2 C1 Ag1 128.0(6) . . ?
C3 C2 N1 107.7(7) . . ?
C3 C2 H2 126.1 . . ?
N1 C2 H2 126.1 . . ?
C2 C3 N2 105.5(7) . . ?
C2 C3 H3 127.2 . . ?
N2 C3 H3 127.2 . . ?
N1 C4 C5 111.5(6) . . ?
N1 C4 H4A 109.3 . . ?
C5 C4 H4A 109.3 . . ?
N1 C4 H4B 109.3 . . ?
C5 C4 H4B 109.3 . . ?
H4A C4 H4B 108.0 . . ?
O1 C5 N3 127.5(8) . . ?
O1 C5 C4 122.2(7) . . ?
N3 C5 C4 110.2(7) . . ?
N3 C6 C7 110.3(7) . . ?
N3 C6 C9 110.7(7) . . ?
C7 C6 C9 111.1(7) . . ?
N3 C6 C8 105.9(7) . . ?
C7 C6 C8 108.8(8) . . ?
C9 C6 C8 109.9(7) . . ?
C6 C7 H7A 109.5 . . ?
C6 C7 H7B 109.5 . . ?
H7A C7 H7B 109.5 . . ?
C6 C7 H7C 109.5 . . ?
H7A C7 H7C 109.5 . . ?
H7B C7 H7C 109.5 . . ?
C6 C8 H8A 109.5 . . ?
C6 C8 H8B 109.5 . . ?
H8A C8 H8B 109.5 . . ?
C6 C8 H8C 109.5 . . ?
H8A C8 H8C 109.5 . . ?
H8B C8 H8C 109.5 . . ?
C6 C9 H9A 109.5 . . ?
C6 C9 H9B 109.5 . . ?
H9A C9 H9B 109.5 . . ?
C6 C9 H9C 109.5 . . ?
H9A C9 H9C 109.5 . . ?
H9B C9 H9C 109.5 . . ?
N2 C10 C11 112.3(7) . . ?
N2 C10 H10A 109.1 . . ?
C11 C10 H10A 109.1 . . ?
N2 C10 H10B 109.1 . . ?
C11 C10 H10B 109.1 . . ?
H10A C10 H10B 107.9 . . ?
C12 C11 C16 118.8(8) . . ?
C12 C11 C10 121.7(8) . . ?
C16 C11 C10 119.3(8) . . ?
C11 C12 C13 119.5(8) . . ?
C11 C12 H12 120.3 . . ?
C13 C12 H12 120.3 . . ?
C14 C13 C12 121.2(8) . . ?
C14 C13 H13 119.4 . . ?
C12 C13 H13 119.4 . . ?
C15 C14 C13 118.3(10) . . ?
C15 C14 H14 120.9 . . ?
C13 C14 H14 120.9 . . ?
C16 C15 C14 121.4(9) . . ?
C16 C15 H15 119.3 . . ?
C14 C15 H15 119.3 . . ?
C15 C16 C11 120.8(8) . . ?
C15 C16 H16 119.6 . . ?
C11 C16 H16 119.6 . . ?
 
loop_
 _geom_torsion_atom_site_label_1
 _geom_torsion_atom_site_label_2
 _geom_torsion_atom_site_label_3
 _geom_torsion_atom_site_label_4
 _geom_torsion
 _geom_torsion_site_symmetry_1
 _geom_torsion_site_symmetry_2
 _geom_torsion_site_symmetry_3
 _geom_torsion_site_symmetry_4
 _geom_torsion_publ_flag
C2 N1 C1 N2 -0.6(9) . . . . ?
C4 N1 C1 N2 -175.0(7) . . . . ?
C2 N1 C1 Ag1 -172.5(6) . . . . ?
C4 N1 C1 Ag1 13.1(11) . . . . ?
C3 N2 C1 N1 1.5(9) . . . . ?
C10 N2 C1 N1 175.1(7) . . . . ?
C3 N2 C1 Ag1 173.2(6) . . . . ?
C10 N2 C1 Ag1 -13.3(12) . . . . ?
Cl1 Ag1 C1 N1 67.1(14) . . . . ?
Ag1 Ag1 C1 N1 -71.3(7) 3_655 . . . ?
Cl1 Ag1 C1 N2 -102.8(11) . . . . ?
Ag1 Ag1 C1 N2 118.7(7) 3_655 . . . ?
C1 N1 C2 C3 -0.5(10) . . . . ?
C4 N1 C2 C3 173.8(7) . . . . ?
N1 C2 C3 N2 1.3(9) . . . . ?
C1 N2 C3 C2 -1.8(9) . . . . ?
C10 N2 C3 C2 -175.5(8) . . . . ?
C1 N1 C4 C5 -76.9(10) . . . . ?
C2 N1 C4 C5 109.5(8) . . . . ?
C6 N3 C5 O1 2.8(14) . . . . ?
C6 N3 C5 C4 178.3(7) . . . . ?
N1 C4 C5 O1 -24.7(11) . . . . ?
N1 C4 C5 N3 159.5(7) . . . . ?
C5 N3 C6 C7 -65.8(10) . . . . ?
C5 N3 C6 C9 57.6(10) . . . . ?
C5 N3 C6 C8 176.7(8) . . . . ?
C1 N2 C10 C11 -109.7(9) . . . . ?
C3 N2 C10 C11 63.1(10) . . . . ?
N2 C10 C11 C12 31.2(10) . . . . ?
N2 C10 C11 C16 -152.8(7) . . . . ?
C16 C11 C12 C13 1.4(11) . . . . ?
C10 C11 C12 C13 177.5(7) . . . . ?
C11 C12 C13 C14 -0.9(12) . . . . ?
C12 C13 C14 C15 -0.3(13) . . . . ?
C13 C14 C15 C16 1.1(14) . . . . ?
C14 C15 C16 C11 -0.6(14) . . . . ?
C12 C11 C16 C15 -0.7(12) . . . . ?
C10 C11 C16 C15 -176.8(8) . . . . ?
 
_diffrn_measured_fraction_theta_max    0.949
_diffrn_reflns_theta_full              25.00
_diffrn_measured_fraction_theta_full   0.949
_refine_diff_density_max    4.839
_refine_diff_density_min   -1.510
_refine_diff_density_rms    0.209
